# Supplementary material for: Evaluating the Revised American Society for Gastrointestinal Endoscopy Guidelines for Common Bile Duct Stone Diagnosis
Source: PubMed Central journal article supplement — Clin Endosc. 2020 Nov 6;54(2):269–74. doi: 10.5946/ce.2020.100 (PMC8039731; doi:10.5946/ce.2020.100), 2020-11-06
Supplement: ce-2020-100-suppl.pdf [file ce-2020-100-suppl.pdf]

**Supplementary Table 1.** American Society for Gastrointestinal Endoscopy 2010 Risk Stratification Tool

Risk category

High: Presence of 1 “very strong” criteria OR both “strong” criteria

Low: No criteria met

Intermediate: All other patients

Very strong criteria

CBD stone visualized on transabdominal US

Clinical evidence of cholangitis

Total bilirubin >4 mg/dL

Strong criteria

Dilated CBD on US (>6 mm)

Total bilirubin level 1.8–4 mg/dL

Moderate criteria

Abnormal LFTs

Age >55 yr

CBD, common bile duct; LFT, liver function test result.

**Supplementary Table 2.** American Society for Gastrointestinal Endoscopy 2019 Risk Stratification Tool

Risk category

High: Presence of any high risk criteria

Low: No criteria met

Intermediate: All other patients

High risk criteria

CBD stone visualized on transabdominal US OR CT scan

Total bilirubin >4 mg/dL AND dilated CBD on imaging (>6 mm)

Clinical evidence of cholangitis

Moderate risk criteria

Abnormal LFTs

Bilirubin >1.8 mg/dL

Dilated CBD on imaging

Age >55 yr

CBD, common bile duct; CT, computed tomography; LFT, liver function test result.
